# Supplementary material for: Variants of MicroRNA Genes: Gender-Specific Associations with Multiple Sclerosis Risk and Severity
Source: PubMed Central journal article supplement (PMC4581341; doi:10.3390/ijms160820067), 2015-08-24
Supplement: ijms-16-20067-s001.pdf [file ijms-16-20067-s001.pdf]

# Supplementary Information

**Table S1.** Comparison of observed miRNA genotype frequencies with expected frequencies according to Hardy-Weinberg equilibrium.

|              |                               | Healthy Controls |                 |                      |                      |                 |          |                 | MS Patients |                               |          |                 |                      |                      |                 |          |                 |
|--------------|-------------------------------|------------------|-----------------|----------------------|----------------------|-----------------|----------|-----------------|-------------|-------------------------------|----------|-----------------|----------------------|----------------------|-----------------|----------|-----------------|
|              | Gene SNP ID                   | Genotype         | Observed        | Observed             | Expected             | Expected        | $\chi^2$ | <i>p</i> -Value |             | Gene SNP ID                   | Genotype | Observed        | Observed             | Expected             | Expected        | $\chi^2$ | <i>p</i> -Value |
|              |                               |                  | No. of Patients | Genotype Frequencies | Genotype Frequencies | No. of Patients |          |                 |             |                               |          | No. of Patients | Genotype Frequencies | Genotype Frequencies | No. of Patients |          |                 |
| Entire group | <i>MIR146A</i><br>rs2910164   | C/C              | 20              | 0.045                | 0.048                | 21              | 0.097    | 0.760           |             | <i>MIR146A</i><br>rs2910164   | C/C      | 30              | 0.053                | 0.043                | 24              | 2.402    | 0.12            |
|              |                               | C/G              | 153             | 0.347                | 0.342                | 151             |          |                 |             |                               | C/G      | 172             | 0.307                | 0.328                | 184             |          |                 |
|              |                               | G/G              | 268             | 0.608                | 0.611                | 269             |          |                 |             |                               | G/G      | 359             | 0.64                 | 0.630                | 353             |          |                 |
|              | <i>MIR196A2</i><br>rs11614913 | C/C              | 172             | 0.390                | 0.400                | 176             | 0.854    | 0.360           |             | <i>MIR196A2</i><br>rs11614913 | C/C      | 220             | 0.392                | 0.391                | 219             | 0.0051   | 0.94            |
|              |                               | C/T              | 214             | 0.485                | 0.465                | 205             |          |                 |             |                               | C/T      | 262             | 0.467                | 0.468                | 263             |          |                 |
|              |                               | T/T              | 55              | 0.125                | 0.135                | 60              |          |                 |             |                               | T/T      | 79              | 0.141                | 0.140                | 79              |          |                 |
|              | <i>MIR499A</i><br>rs3746444   | C/C              | 13              | 0.029                | 0.034                | 15              | 0.503    | 0.480           |             | <i>MIR499A</i><br>rs3746444   | C/C      | 21              | 0.037                | 0.038                | 21              | 0.0029   | 0.96            |
|              |                               | C/T              | 138             | 0.313                | 0.302                | 133             |          |                 |             |                               | C/T      | 176             | 0.314                | 0.313                | 175             |          |                 |
|              |                               | T/T              | 290             | 0.658                | 0.663                | 293             |          |                 |             |                               | T/T      | 364             | 0.649                | 0.650                | 364             |          |                 |
| Women        | <i>MIR146A</i><br>rs2910164   | C/C              | 12              | 0.042                | 0.054                | 15              | 1.196    | 0.270           |             | <i>MIR146A</i><br>rs2910164   | C/C      | 15              | 0.038                | 0.036                | 14              | 0.034    | 0.85            |
|              |                               | C/G              | 108             | 0.379                | 0.356                | 101             |          |                 |             |                               | C/G      | 121             | 0.306                | 0.309                | 122             |          |                 |
|              |                               | G/G              | 165             | 0.579                | 0.591                | 168             |          |                 |             |                               | G/G      | 259             | 0.656                | 0.654                | 259             |          |                 |
|              | <i>MIR196A2</i><br>rs11614913 | C/C              | 113             | 0.396                | 0.396                | 113             | 0.00044  | 0.99            |             | <i>MIR196A2</i><br>rs11614913 | C/C      | 158             | 0.400                | 0.398                | 157             | 0.050    | 0.82            |
|              |                               | C/T              | 133             | 0.467                | 0.466                | 133             |          |                 |             |                               | C/T      | 182             | 0.461                | 0.466                | 184             |          |                 |
|              |                               | T/T              | 39              | 0.137                | 0.137                | 39              |          |                 |             |                               | T/T      | 55              | 0.139                | 0.137                | 54              |          |                 |
|              | <i>MIR499A</i><br>rs3746444   | C/C              | 4               | 0.014                | 0.028                | 8               | 2.982    | 0.084           |             | <i>MIR499A</i><br>rs3746444   | C/C      | 13              | 0.033                | 0.036                | 14              | 0.165    | 0.68            |
|              |                               | C/T              | 88              | 0.309                | 0.280                | 80              |          |                 |             |                               | C/T      | 124             | 0.314                | 0.308                | 122             |          |                 |
|              |                               | T/T              | 193             | 0.677                | 0.691                | 197             |          |                 |             |                               | T/T      | 258             | 0.653                | 0.656                | 259             |          |                 |
|              | <i>MIR223</i><br>rs1044165    | C/C              | 220             | 0.772                | 0.763                | 217             | 1.729    | 0.190           |             | <i>MIR223</i><br>rs1044165    | C/C      | 273             | 0.691                | 0.691                | 273             | 0.0051   | 0.94            |
|              |                               | C/T              | 58              | 0.203                | 0.221                | 63              |          |                 |             |                               | C/T      | 111             | 0.281                | 0.280                | 111             |          |                 |
|              |                               | T/T              | 7               | 0.025                | 0.016                | 5               |          |                 |             |                               | T/T      | 11              | 0.028                | 0.028                | 11              |          |                 |

Table S1. Cont.

| Healthy Controls |                               |          |                 |                      |                      |                 |          |                 | MS Patients |                               |          |                 |                      |                      |                          |          |                 |
|------------------|-------------------------------|----------|-----------------|----------------------|----------------------|-----------------|----------|-----------------|-------------|-------------------------------|----------|-----------------|----------------------|----------------------|--------------------------|----------|-----------------|
| -                | Gene SNP ID                   | Genotype | Observed        | Observed             | Expected             | Expected        | $\chi^2$ | <i>p</i> -Value | -           | Gene SNP ID                   | Genotype | Observed        | Observed             | Expected             | Expected No. of Patients | $\chi^2$ | <i>p</i> -Value |
|                  |                               |          | No. of Patients | Genotype Frequencies | Genotype Frequencies | No. of Patients |          |                 |             |                               |          | No. of Patients | Genotype Frequencies | Genotype Frequencies |                          |          |                 |
| Men              | <i>MIR146A</i><br>rs2910164   | C/C      | 8               | 0.054                | 0.039                | 6               | 1.241    | 0.270           | Men         | <i>MIR146A</i><br>rs2910164   | C/C      | 15              | 0.090                | 0.059                | 10                       | 4.653    | <b>0.031</b>    |
|                  |                               | C/G      | 43              | 0.288                | 0.318                | 47              |          |                 |             |                               | C/G      | 51              | 0.307                | 0.368                | 61                       |          |                 |
|                  |                               | G/G      | 98              | 0.658                | 0.643                | 96              |          |                 |             |                               | G/G      | 100             | 0.603                | 0.572                | 95                       |          |                 |
|                  | <i>MIR196A2</i><br>rs11614913 | C/C      | 56              | 0.376                | 0.411                | 61              | 3.440    | 0.064           |             | <i>MIR196A2</i><br>rs11614913 | C/C      | 62              | 0.373                | 0.377                | 63                       | 0.049    | 0.83            |
|                  |                               | C/T      | 79              | 0.530                | 0.460                | 69              |          |                 |             |                               | C/T      | 80              | 0.482                | 0.474                | 79                       |          |                 |
|                  |                               | T/T      | 14              | 0.094                | 0.129                | 19              |          |                 |             |                               | T/T      | 24              | 0.145                | 0.149                | 25                       |          |                 |
|                  | <i>MIR499A</i><br>rs3746444   | C/C      | 8               | 0.054                | 0.049                | 7               | 0.108    | 0.740           |             | <i>MIR499A</i><br>rs3746444   | C/C      | 8               | 0.048                | 0.042                | 7                        | 0.245    | 0.62            |
|                  |                               | C/T      | 50              | 0.336                | 0.345                | 51              |          |                 |             |                               | C/T      | 52              | 0.313                | 0.325                | 54                       |          |                 |
|                  |                               | T/T      | 91              | 0.610                | 0.605                | 90              |          |                 |             |                               | T/T      | 106             | 0.639                | 0.633                | 105                      |          |                 |

Significant *p*-values are in bold.

**Table S2.** Case-control comparison of genetic variants in miRNA genes with MS risk.

| Gene SNP ID                   | Carriage of Genotypes and Alleles | Carriers (%)                  |                            | <i>p</i> -Value | OR (95% CI)         | Carriers (%)               |                            | <i>p</i> -Value | OR (95% CI)         | Carriers (%)               |                            | <i>p</i> -Value | OR (95% CI)         |
|-------------------------------|-----------------------------------|-------------------------------|----------------------------|-----------------|---------------------|----------------------------|----------------------------|-----------------|---------------------|----------------------------|----------------------------|-----------------|---------------------|
|                               |                                   | MS Cases<br><i>n</i> = 561    | Controls<br><i>n</i> = 441 |                 |                     | MS Cases<br><i>n</i> = 395 | Controls<br><i>n</i> = 285 |                 |                     | MS Cases<br><i>n</i> = 166 | Controls<br><i>n</i> = 149 |                 |                     |
|                               |                                   | Without gender stratification |                            |                 |                     | Women                      |                            |                 |                     | Men                        |                            |                 |                     |
| <i>MIR146A</i><br>rs2910164   | C/C                               | 30 (5.3)                      | 20 (4.5)                   | 0.33            | 1.19<br>(0.67–2.12) | 15 (3.8)                   | 12 (4.2)                   | 0.47            | 0.90<br>(0.41–1.95) | 15 (9.0)                   | 8 (5.4)                    | 0.15            | 1.75<br>(0.72–4.26) |
|                               | C/G                               | 172 (30.7)                    | 153 (34.7)                 | 0.10            | 0.83<br>(0.64–1.09) | 121 (30.6)                 | 108 (37.9)                 | <b>0.030</b>    | 0.72<br>(0.53–1.00) | 51 (30.7)                  | 43 (28.8)                  | 0.41            | 1.09<br>(0.67–1.77) |
|                               | G/G                               | 359 (64.0)                    | 268 (60.8)                 | 0.16            | 1.15<br>(0.89–1.48) | 259 (65.6)                 | 165 (57.9)                 | <b>0.025</b>    | 1.39<br>(1.01–1.90) | 100 (60.3)                 | 98 (65.8)                  | 0.19            | 0.79<br>(0.50–1.25) |
|                               | C                                 | 202 (36.0)                    | 173 (39.2)                 | 0.16            | 0.87<br>(0.67–1.13) | 136 (34.4)                 | 120 (42.1)                 | <b>0.025</b>    | 0.72<br>(0.53–0.99) | 66 (39.8)                  | 51 (34.2)                  | 0.19            | 1.27<br>(0.80–2.01) |
|                               | G                                 | 531 (94.7)                    | 421 (95.5)                 | 0.33            | 0.84<br>(0.47–1.50) | 380 (96.2)                 | 273 (95.8)                 | 0.47            | 1.11<br>(0.51–2.42) | 151 (91.0)                 | 141 (94.6)                 | 0.15            | 0.57<br>(0.23–1.39) |
| <i>MIR196A2</i><br>rs11614913 | C/C                               | 220 (39.2)                    | 172 (39.0)                 | 0.50            | 1.01<br>(0.78–1.30) | 158 (40.0)                 | 113 (39.6)                 | 0.50            | 1.01<br>(0.74–1.39) | 62 (37.3)                  | 56 (37.6)                  | 0.53            | 0.99<br>(0.63–1.56) |
|                               | C/T                               | 262 (46.7)                    | 214 (48.5)                 | 0.31            | 0.93<br>(0.72–1.19) | 182 (46.1)                 | 133 (46.7)                 | 0.47            | 0.98<br>(0.72–1.33) | 80 (48.2)                  | 79 (53.0)                  | 0.23            | 0.82<br>(0.53–1.28) |
|                               | T/T                               | 79 (14.1)                     | 55 (12.5)                  | 0.26            | 1.15<br>(0.80–1.66) | 55 (13.9)                  | 39 (13.7)                  | 0.51            | 1.02<br>(0.66–1.59) | 24 (14.5)                  | 14 (9.4)                   | 0.11            | 1.63<br>(0.81–3.28) |
|                               | C                                 | 482 (86.0)                    | 386 (87.5)                 | 0.26            | 0.87<br>(0.60–1.26) | 340 (86.1)                 | 246 (86.3)                 | 0.51            | 0.98<br>(0.63–1.52) | 142 (85.5)                 | 135 (90.6)                 | 0.11            | 0.61<br>(0.30–1.24) |
|                               | T                                 | 341 (60.8)                    | 269 (61.0)                 | 0.50            | 0.99<br>(0.77–1.28) | 237 (60.0)                 | 172 (60.4)                 | 0.50            | 0.99<br>(0.72–1.35) | 104 (62.7)                 | 93 (62.4)                  | 0.53            | 1.01<br>(0.64–1.60) |

Table S2. Cont.

| Gene SNP ID                 | Carriage of Genotypes and Alleles | Carriers (%)                  |                            |                 | OR (95% CI)         | Carriers (%)               |                            |                 | OR (95% CI)         | Carriers (%)               |                            |                 | OR (95% CI)         |
|-----------------------------|-----------------------------------|-------------------------------|----------------------------|-----------------|---------------------|----------------------------|----------------------------|-----------------|---------------------|----------------------------|----------------------------|-----------------|---------------------|
|                             |                                   | MS Cases<br><i>n</i> = 561    | Controls<br><i>n</i> = 441 | <i>p</i> -Value |                     | MS Cases<br><i>n</i> = 395 | Controls<br><i>n</i> = 285 | <i>p</i> -Value |                     | MS Cases<br><i>n</i> = 166 | Controls<br><i>n</i> = 149 | <i>p</i> -Value |                     |
|                             |                                   | Without gender stratification |                            |                 |                     | Women                      |                            |                 |                     | Men                        |                            |                 |                     |
| <i>MIR499A</i><br>rs3746444 | C/C                               | 21 (3.7)                      | 13 (2.9)                   | 0.24            | 1.38<br>(0.67–2.84) | 13 (3.3)                   | 4 (1.4)                    | 0.095           | 2.38<br>(0.77–7.38) | 8 (4.8)                    | 8 (5.4)                    | 0.51            | 0.89<br>(0.32–2.42) |
|                             | C/T                               | 176 (31.4)                    | 138 (31.3)                 | 0.52            | 1.00<br>(0.76–1.30) | 124 (31.4)                 | 88 (30.9)                  | 0.49            | 1.02<br>(0.73–1.42) | 52 (31.3)                  | 50 (33.6)                  | 0.41            | 0.92<br>(0.57–1.48) |
|                             | T/T                               | 364 (64.9)                    | 290 (65.8)                 | 0.40            | 0.96<br>(0.74–1.25) | 258 (65.3)                 | 193 (67.7)                 | 0.30            | 0.90<br>(0.65–1.25) | 106 (63.9)                 | 91 (61.0)                  | 0.38            | 1.11<br>(0.70–1.75) |
|                             | C                                 | 197 (35.1)                    | 151 (34.2)                 | 0.40            | 1.04<br>(0.80–1.36) | 137 (34.7)                 | 92 (32.3)                  | 0.30            | 1.11<br>(0.80–1.53) | 60 (36.1)                  | 58 (38.9)                  | 0.38            | 0.90<br>(0.57–1.43) |
|                             | T                                 | 540 (96.3)                    | 428 (97.1)                 | 0.24            | 0.72<br>(0.35–1.49) | 382 (96.7)                 | 281 (98.6)                 | 0.095           | 0.42<br>(0.14–1.30) | 158 (95.2)                 | 141 (94.6)                 | 0.51            | 1.13<br>(0.41–3.09) |
| <i>MIR223</i><br>rs1044165  | C/C                               | -                             | -                          | -               | -                   | 273 (69.1)                 | 220 (77.2)                 | <b>0.012</b>    | 0.66<br>(0.47–0.94) | -                          | -                          | -               | -                   |
|                             | C/T                               | -                             | -                          | -               | -                   | 111 (28.1)                 | 58 (20.3)                  | <b>0.013</b>    | 1.53<br>(1.06–2.20) | -                          | -                          | -               | -                   |
|                             | T/T                               | -                             | -                          | -               | -                   | 11 (2.8)                   | 7 (2.5)                    | 0.50            | 1.14<br>(0.44–2.97) | -                          | -                          | -               | -                   |
|                             | C                                 | 517 (92.2)                    | 413 (93.7)                 | 0.22            | 0.80<br>(0.49–1.30) | 384 (97.2)                 | 278 (97.5)                 | 0.50            | 0.88<br>(0.34–2.30) | 133 (80.1)                 | 128 (85.9)                 | 0.11            | 0.66<br>(0.36–1.20) |
|                             | T                                 | 155 (27.6)                    | 86 (19.5)                  | <b>0.0017</b>   | 1.58<br>(1.17–2.13) | 122 (30.9)                 | 65 (22.8)                  | <b>0.012</b>    | 1.51<br>(1.07–2.15) | 33 (19.9)                  | 21 (14.1)                  | 0.11            | 1.51<br>(0.83–2.75) |

Significant *p*-values are in bold.

**Table S3.** Case-control comparison of genetic variants in miRNA genes with MSSS.

| Gene SNP ID                   | Carriage of Genotypes and Alleles | Carriers (%)                 |                              |                 | OR (95% CI)         | Carriers (%)                 |                              |                 | OR (95% CI)         | Carriers (%)                |                             |                 | OR (95% CI)         |
|-------------------------------|-----------------------------------|------------------------------|------------------------------|-----------------|---------------------|------------------------------|------------------------------|-----------------|---------------------|-----------------------------|-----------------------------|-----------------|---------------------|
|                               |                                   | MSSS > 3.5<br><i>n</i> = 304 | MSSS ≤ 3.5<br><i>n</i> = 242 | <i>p</i> -Value |                     | MSSS > 3.5<br><i>n</i> = 207 | MSSS ≤ 3.5<br><i>n</i> = 181 | <i>p</i> -Value |                     | MSSS > 3.5<br><i>n</i> = 97 | MSSS ≤ 3.5<br><i>n</i> = 61 | <i>p</i> -Value |                     |
| Without gender stratification |                                   |                              |                              |                 | Women               |                              |                              |                 | Men                 |                             |                             |                 |                     |
| <i>MIR146A</i><br>rs2910164   | C/C                               | 15 (4.9)                     | 13 (5.4)                     | 0.48            | 0.91<br>(0.43–1.96) | 8 (3.9)                      | 7 (3.9)                      | 0.60            | 1.00<br>(0.36–2.81) | 7 (7.2)                     | 6 (9.8)                     | 0.38            | 0.71<br>(0.23–2.23) |
|                               | C/G                               | 91 (30.0)                    | 75 (31.0)                    | 0.43            | 0.95<br>(0.66–1.37) | 61 (29.4)                    | 57 (31.5)                    | 0.37            | 0.91<br>(0.59–1.40) | 30 (30.9)                   | 18 (29.5)                   | 0.50            | 1.07<br>(0.53–2.15) |
|                               | G/G                               | 198 (65.1)                   | 154 (63.6)                   | 0.39            | 1.07<br>(0.75–1.52) | 138 (66.7)                   | 117 (64.6)                   | 0.38            | 1.09<br>(0.72–1.67) | 60 (61.9)                   | 37 (60.7)                   | 0.51            | 1.05<br>(0.55–2.03) |
|                               | C                                 | 106 (34.9)                   | 88 (36.4)                    | 0.39            | 0.94<br>(0.66–1.33) | 69 (33.3)                    | 64 (35.4)                    | 0.38            | 0.91<br>(0.60–1.39) | 37 (38.1)                   | 24 (39.3)                   | 0.51            | 0.95<br>(0.49–1.83) |
|                               | G                                 | 289 (95.1)                   | 229 (94.6)                   | 0.48            | 1.09<br>(0.51–2.35) | 199 (96.1)                   | 174 (96.1)                   | 0.60            | 1.00<br>(0.36–2.82) | 90 (92.8)                   | 55 (90.2)                   | 0.38            | 1.40<br>(0.45–4.39) |
| <i>MIR196A2</i><br>rs11614913 | C/C                               | 110 (36.2)                   | 101 (41.7)                   | 0.11            | 0.79<br>(0.56–1.12) | 77 (37.2)                    | 78 (43.1)                    | 0.14            | 0.78<br>(0.52–1.18) | 33 (34.0)                   | 23 (37.7)                   | 0.38            | 0.85<br>(0.44–1.66) |
|                               | C/T                               | 153 (50.3)                   | 103 (42.6)                   | 0.043           | 1.37<br>(0.97–1.92) | 103 (49.8)                   | 76 (42.0)                    | 0.076           | 1.37<br>(0.92–2.04) | 50 (51.6)                   | 27 (44.3)                   | 0.23            | 1.34<br>(0.70–2.55) |
|                               | T/T                               | 41 (13.5)                    | 38 (15.7)                    | 0.27            | 0.84<br>(0.52–1.35) | 27 (13.0)                    | 27 (14.9)                    | 0.35            | 0.86<br>(0.48–1.52) | 14 (14.4)                   | 11 (18.0)                   | 0.35            | 0.77<br>(0.32–1.82) |
|                               | C                                 | 263 (86.5)                   | 204 (84.3)                   | 0.27            | 1.19<br>(0.74–1.93) | 180 (87.0)                   | 154 (85.1)                   | 0.35            | 1.17<br>(0.66–2.08) | 83 (85.6)                   | 50 (82.0)                   | 0.35            | 1.30<br>(0.55–3.10) |
|                               | T                                 | 194 (63.8)                   | 141 (58.2)                   | 0.11            | 1.26<br>(0.89–1.79) | 130 (62.8)                   | 103 (56.9)                   | 0.14            | 1.28<br>(0.85–1.92) | 64 (66.0)                   | 38 (62.3)                   | 0.38            | 1.17<br>(0.60–2.29) |

Table S3. Cont.

| Gene SNP ID                   | Carriage of Genotypes and Alleles | Carriers (%)                 |                              |                 | OR (95% CI)         | Carriers (%)                 |                              |                  | OR (95% CI)          | Carriers (%)                |                             |                 | OR (95% CI)         |
|-------------------------------|-----------------------------------|------------------------------|------------------------------|-----------------|---------------------|------------------------------|------------------------------|------------------|----------------------|-----------------------------|-----------------------------|-----------------|---------------------|
|                               |                                   | MSSS > 3.5<br><i>n</i> = 304 | MSSS ≤ 3.5<br><i>n</i> = 242 | <i>p</i> -Value |                     | MSSS > 3.5<br><i>n</i> = 207 | MSSS ≤ 3.5<br><i>n</i> = 181 | <i>p</i> -Value  |                      | MSSS > 3.5<br><i>n</i> = 97 | MSSS ≤ 3.5<br><i>n</i> = 61 | <i>p</i> -Value |                     |
| Without gender stratification |                                   |                              |                              |                 | Women               |                              |                              |                  | Men                  |                             |                             |                 |                     |
| <i>MIR499A</i><br>rs3746444   | C/C                               | 7 (2.3)                      | 11 (4.5)                     | 0.11            | 0.49<br>(0.19–1.30) | 3 (1.4)                      | 9 (5.0)                      | 0.043            | 0.28<br>(0.075–1.05) | 4 (4.1)                     | 2 (3.3)                     | 0.57            | 1.27<br>(0.23–7.15) |
|                               | C/T                               | 112 (36.8)                   | 58 (24.0)                    | <b>0.00081</b>  | 1.85<br>(1.27–2.70) | 86 (41.6)                    | 37 (20.4)                    | <b>0.0000056</b> | 2.77<br>(1.76–4.36)  | 26 (26.8)                   | 21 (34.4)                   | 0.20            | 0.70<br>(0.35–1.40) |
|                               | T/T                               | 185 (60.9)                   | 173 (71.5)                   | <b>0.0059</b>   | 0.62<br>(0.43–0.89) | 118 (57.0)                   | 135 (74.6)                   | <b>0.00020</b>   | 0.45<br>(0.29–0.70)  | 67 (69.1)                   | 38 (62.3)                   | 0.24            | 1.35<br>(0.69–2.65) |
|                               | C                                 | 119 (39.1)                   | 69 (28.5)                    | <b>0.0059</b>   | 1.61<br>(1.12–2.32) | 89 (43.0)                    | 46 (25.4)                    | <b>0.00020</b>   | 2.21<br>(1.44–3.41)  | 30 (30.9)                   | 23 (37.8)                   | 0.24            | 0.74<br>(0.38–1.45) |
|                               | T                                 | 297 (91.8)                   | 231 (95.5)                   | 0.11            | 2.02<br>(0.77–5.29) | 204 (98.6)                   | 172 (95.0)                   | 0.043            | 3.56<br>(0.95–13.35) | 93 (95.9)                   | 59 (96.7)                   | 0.57            | 0.79<br>(0.14–4.44) |
| <i>MIR223</i><br>rs1044165    | C/C                               | -                            | -                            | -               | -                   | 140 (67.6)                   | 129 (71.3)                   | 0.25             | 0.84<br>(0.55–1.30)  | -                           | -                           | -               | -                   |
|                               | C/T                               | -                            | -                            | -               | -                   | 62 (30.0)                    | 46 (25.4)                    | 0.19             | 1.25<br>(0.80–1.96)  | -                           | -                           | -               | -                   |
|                               | T/T                               | -                            | -                            | -               | -                   | 5 (2.4)                      | 6 (3.3)                      | 0.41             | 0.72<br>(0.22–2.41)  | -                           | -                           | -               | -                   |
|                               | C                                 | 283 (93.1)                   | 220 (91.0)                   | 0.22            | 1.35<br>(0.72–2.51) | 202 (97.6)                   | 175 (96.7)                   | 0.41             | 1.39<br>(0.42–4.62)  | 81 (83.5)                   | 45 (73.8)                   | 0.10            | 1.80<br>(0.82–3.94) |
|                               | T                                 | 83 (27.3)                    | 68 (28.1)                    | 0.46            | 0.96<br>(0.66–1.40) | 67 (32.4)                    | 52 (28.7)                    | 0.25             | 1.19<br>(0.77–1.83)  | 16 (16.5)                   | 16 (26.2)                   | 0.10            | 0.56<br>(0.25–1.22) |

Significant *p*-values are in bold.
